# Supplementary material for: Detection of epinephrine using a K 2 Fe 4 O 7 modified glassy carbon electrode
Source: Royal Society of Chemistry journal article supplement (doi:10.1039/d4ra00242c), 2024-01-01
Supplement: d4ra00242c1.pdf [file d4ra00242c1.pdf]

## SUPPORTING INFORMATION

CCDC Nr. 1018167

Space group P -3 1 m (162)

Cell parameter 5.155(5) 5.155(5) 6.902(13) 90.00 90.00 120.00

Crystal simulation XRD data by jade

### S1 Crystal information for $K_2Fe_4O_7$

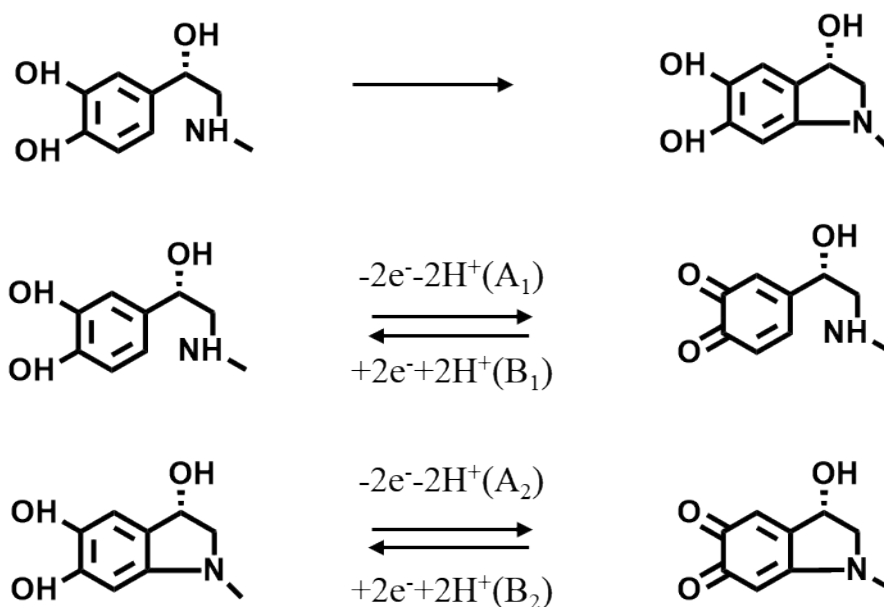

### S2 The oxidation of EP

$$LOD = \frac{3S_D}{S}$$

where  $S_D$  represents the standard deviation of the blank sample, and  $S$  represents the slope.

### S3 The formula for LOD
